# Supplementary material for: Concomitant Coronary Artery Disease in Identical Twins: Case Report and Systematic Literature Review
Source: MDPI journal article supplement (doi:10.3390/jcm12175742), 2023-09-03
Supplement: s1 [file s1]

**Supplementary Table S1.** Basic information regarding the included studies.

| <b>Study</b>               | <b>Country</b> | <b>Gender</b> | <b>Age at onset<br/>(twin 1/<br/>twin 2)</b> | <b>Presenting Symptoms/Signs<br/>(twin 1/<br/>twin 2)</b>                                       | <b>Presenting Condition<br/>(twin 1/<br/>twin 2)</b> | <b>Risk Factors<br/>(twin 1/<br/>twin 2)</b>                                                                                              | <b>Treatment<br/>(twin 1/<br/>twin 2)</b> |
|----------------------------|----------------|---------------|----------------------------------------------|-------------------------------------------------------------------------------------------------|------------------------------------------------------|-------------------------------------------------------------------------------------------------------------------------------------------|-------------------------------------------|
| Giknis et al. 1965 [1]     | USA            | M             | 20/20                                        | Chest pain,<br>Nausea,<br>Hyperhidrosis/<br>Chest pain,<br>Nausea,<br>Hyperhidrosis,<br>Dyspnea | Myocardial infarction/<br>Myocardial infarction      | NR/<br>Smoking,<br>Dyslipidemia                                                                                                           | NR/<br>NR                                 |
| Sidd et al. 1966 [2]       | USA            | M             | 43/42                                        | Chest pain/<br>Chest pain                                                                       | Unstable angina/<br>Unstable angina                  | Smoking,<br>Dyslipidemia/<br>Smoking,<br>Dyslipidemia                                                                                     | NR/<br>NR                                 |
| Kreulen et al. 1975 [3]    | USA            | M             | 30/30                                        | Chest pain/<br>Chest pain,<br>Diaphoresis                                                       | Unstable angina/<br>Unstable angina                  | Dyslipidemia,<br>Systolic hypertension/<br>Dyslipidemia,<br>Systolic hypertension                                                         | CABG/<br>CABG                             |
| Holmes et al. 1981 [4]     | USA            | M             | 32/33                                        | NR                                                                                              | Unstable angina/<br>Myocardial infarction            | Smoking,<br>Dyslipidemia/<br>Smoking,<br>Dyslipidemia                                                                                     | NR/<br>CABG                               |
|                            |                | M             | 48/47                                        | 4th heart sound,<br>Systolic ejection murmur/<br>4th heart sound                                | Unstable angina/<br>Unstable angina                  | Hypertension,<br>Dyslipidemia/<br>Hypertension,<br>Dyslipidemia,<br>Smoking                                                               | NR/<br>CABG                               |
| Herrington et al. 1987 [5] | USA            | M             | 46/47                                        | NR                                                                                              | Myocardial infarction/<br>Myocardial infarction      | Smoking/<br>Smoking                                                                                                                       | NR/<br>NR                                 |
|                            |                | M             | 44/46                                        | NR                                                                                              | Unstable angina /<br>Unstable angina                 | Smoking, Diabetes mellitus, Systolic hypertension,<br>Dyslipidemia/<br>Smoking, Diabetes mellitus, Systolic hypertension,<br>Dyslipidemia | NR/<br>NR                                 |
| Kanda et al. 1991 [6]      | Japan          | M             | 37/-                                         | Respiratory distress/<br>none                                                                   | Myocardial infarction/<br>Unstable angina            | Diabetes mellitus,<br>Smoking, Obesity/<br>Diabetes mellitus                                                                              | NO (died)/<br>NR                          |
| Samuels et al. 1999 [7]    | USA            | F             | 66/68                                        | Retrosternal chest discomfort<br>radiating to left axilla/<br>none                              | Unstable angina /<br>Angina                          | Dyslipidemia/<br>Dyslipidemia                                                                                                             | CABG/<br>CABG                             |

|                              |             |   |       |                                        |                                                 |                                                                                            |                                 |
|------------------------------|-------------|---|-------|----------------------------------------|-------------------------------------------------|--------------------------------------------------------------------------------------------|---------------------------------|
| Frings et al.<br>2000 [8]    | Germany     | M | 29/29 | NR                                     | Myocardial infarction/<br>Positive stress test  | Dyslipidemia/<br>Dyslipidemia                                                              | CABG/<br>PCI &<br>CABG          |
|                              |             | F | 49/51 | NR                                     | Unstable angina/<br>Unstable angina             | Dyslipidemia,<br>Hypertension,<br>Diabetes mellitus/<br>Dyslipidemia,<br>Hypertension      | PCI &<br>CABG/<br>PCI &<br>CABG |
|                              |             | M | 41/47 | NR                                     | Myocardial infarction/<br>Angina                | Smoking, Obesity,<br>Hypertension/<br>Smoking,<br>Dyslipidemia                             | PCI/<br>PCI &<br>CABG           |
| Serdar et al.<br>2000 [9]    | Turkey      | M | 43/43 | NR                                     | Myocardial infarction/<br>Myocardial infarction | Smoking/<br>Smoking                                                                        | CABG/<br>CABG                   |
| Kaluza et al.<br>2000 [10]   | USA         | M | 55/55 | NR                                     | Unstable angina/<br>Unstable angina             | Smoking,<br>Dyslipidemia/<br>Smoking,<br>Dyslipidemia                                      | PCI/<br>PCI                     |
| Nathoe et al.<br>2002 [11]   | Netherlands | F | 58/58 | NR                                     | Unstable angina/<br>Unstable angina             | Dyslipidemia,<br>Smoking,<br>Hypertension,<br>Obesity/<br>Obesity                          | PCI/<br>PCI                     |
|                              |             | M | 39/34 | NR                                     | Unstable angina/<br>Myocardial infarction       | Smoking/<br>Smoking                                                                        | CABG/<br>CABG                   |
| Cokkinos et al.<br>2006 [12] | Greece      | F | 65/65 | NR                                     | Unstable angina /<br>Unstable angina            | Dyslipidemia,<br>Diabetes mellitus/<br>Dyslipidemia,<br>Diabetes mellitus,<br>Hypertension | PCI/<br>PCI                     |
| Gullu et al.<br>2007 [13]    | Turkey      | M | 62/62 | NR/<br>non-specific<br>angina symptoms | Unstable angina /<br>Unstable angina            | Dyslipidemia,<br>Obesity, Smoking/<br>Obesity                                              | CABG/<br>CABG                   |
| Segura et al.<br>2007 [14]   | Spain       | M | 49/49 | NR                                     | Unstable angina/<br>Unstable angina             | Dyslipidemia,<br>Smoking,<br>Hypertension/<br>Dyslipidemia,<br>Smoking,<br>Hypertension    | PCI/<br>PCI                     |
| Turley et al.<br>2008 [15]   | UK          | M | 46/46 | Chest discomfort/<br>Chest discomfort  | Unstable angina /<br>Stable angina              | Dyslipidemia,<br>Hypertension,<br>Smoking, Obesity/<br>Dyslipidemia,<br>Hypertension       | PCI/<br>PCI                     |
| Douglas et al.<br>2009 [16]  | UK          | M | 47/42 | NR                                     | Myocardial infarction/<br>Myocardial infarction | Dyslipidemia,<br>Smoking,<br>Hypertension/<br>Hypertension                                 | NR/<br>NR                       |

|                                     |        |   |       |                                                                        |                                                       |                                                                              |                  |
|-------------------------------------|--------|---|-------|------------------------------------------------------------------------|-------------------------------------------------------|------------------------------------------------------------------------------|------------------|
|                                     |        |   |       |                                                                        |                                                       | Dyslipidemia,<br>Hypertension                                                |                  |
| Kashish et al.<br>2015 [17]         | USA    | F | 59/60 | Chest pain/<br>NR                                                      | Unstable<br>angina/<br>Cardiac<br>arrest              | Dyslipidemia,<br>Smoking,<br>Hypertension/<br>NR                             | NR/<br>NR (died) |
| Papanikolaou<br>et al. 2017<br>[18] | Greece | F | 45/45 | Atypical chest<br>pain/<br>Precordial pain at<br>rest                  | Myocardial<br>infarction /<br>Unstable<br>angina      | Hypertension/<br>Smoking                                                     | PCI/<br>PCI      |
| Grabowicz et<br>al. 2019 [19]       | Poland | M | 53/53 | NR/<br>Dyspnea upon<br>exertion                                        | Myocardial<br>infarction/<br>ECG<br>treadmill test    | Dyslipidemia/<br>Dyslipidemia                                                | PCI/<br>PCI      |
| Clement et<br>al. 2020 [20]         | Paris  | M | 46/47 | Chest oppression,<br>Left arm<br>discomfort/<br>Chest pain,<br>Dyspnea | Myocardial<br>infarction/<br>Myocardial<br>infarction | Smoking/<br>Smoking                                                          | PCI/<br>PCI      |
| Kern et al.<br>2020 [21]            | Poland | M | 53/54 | NR                                                                     | Myocardial<br>infarction/<br>Low blood<br>pressure    | Dyslipidemia,<br>Hypothyroidism/<br>Dyslipidemia,<br>Hypothyroidism          | PCI/<br>PCI      |
| Kayıkçıoğlu<br>et al. 2020<br>[22]  | Turkey | M | 33/32 | NR                                                                     | Myocardial<br>infarction/<br>Myocardial<br>infarction | Ex-smoker, Familial<br>Dyslipidemia /<br>Ex-smoker, Familial<br>Dyslipidemia | NR/<br>PCI       |
| Smith et al.<br>2021 [23]           | USA    | M | 42/40 | Edema, Dyspnea/<br>NR                                                  | Unstable<br>angina /<br>Myocardial<br>infarction      | Diabetes mellitus,<br>Alcohol, Cocaine,<br>Hypertension/<br>NR               | CABG/<br>NR      |
| Singh et al.<br>2022 [24]           | India  | M | 36/36 | Chest pain/<br>Dyspnea on<br>exertion                                  | Unstable<br>angina /<br>Stable angina                 | Dyslipidemia/<br>Dyslipidemia                                                | PCI/<br>PCI      |
| Kameel et al.<br>2023 [25]          | USA    | M | 54/54 | Chest pain/<br>Chest pain                                              | Unstable<br>angina /<br>Myocardial<br>infarction      | Pre-Diabetes/<br>Pre-Diabetes                                                | NO/<br>PCI       |
| Our case:                           | Greece | M | 46/46 | Chest pain/<br>Chest pain                                              | Myocardial<br>infarction/<br>Unstable<br>angina       | Smoking/<br>Smoking                                                          | PCI/<br>PCI      |

CABG, coronary artery bypass graft surgery; F, female; M, male; NR, not reported; PCI, percutaneous coronary intervention

**Supplementary Table S2.**

Methodological quality of included studies assessing and grading certain domains

| Study                         | Selection | Ascertainment | Causality | Reporting | Total |
|-------------------------------|-----------|---------------|-----------|-----------|-------|
| Giknis et al. 1965 [1]        | ☆         | ☆☆            | ☆         | ☆         | 5/5   |
| Sidd et al. 1966 [2]          | ☆         | ☆☆            | ☆         | ☆         | 5/5   |
| Kreulen et al. 1975 [3]       | ☆         | ☆☆            | ☆         | ☆         | 5/5   |
| Holmes et al. 1981 [4]        | ☆         | ☆☆            | ☆         | ☆         | 5/5   |
| Herrington et al. 1985[5]     | ☆         | ☆☆            | ☆         | ☆         | 5/5   |
| Kanda et al. 1991[6]          | ☆         | ☆☆            | ☆         | ☆         | 5/5   |
| Samuels et al. 1999[7]        | ☆         | ☆☆            | ☆         | ☆         | 5/5   |
| Frings et al. 2000[8]         | ☆         | ☆☆            | ☆         | ☆         | 5/5   |
| Serdar et al. 2000[9]         | ☆         | ☆             |           | ☆         | 3/5   |
| Kaluza et al. 2000[10]        | ☆         | ☆             | ☆         |           | 3/5   |
| Nathoe et al. 2002[11]        | ☆         | ☆☆            | ☆         | ☆         | 5/5   |
| Cokkinos et al. 2006[12]      | ☆         | ☆☆            | ☆         | ☆         | 5/5   |
| Gullu et al. 2007[13]         | ☆         | ☆☆            | ☆         | ☆         | 5/5   |
| Segura et al. 2007[14]        | ☆         | ☆☆            | ☆         | ☆         | 5/5   |
| Turley et al. 2008[15]        | ☆         | ☆☆            | ☆         | ☆         | 5/5   |
| Douglas et al. 2009[16]       | ☆         | ☆☆            | ☆         | ☆         | 5/5   |
| Kashish et al. 2015[17]       | ☆         | ☆☆            | ☆         | ☆         | 5/5   |
| Papanikolaou et al. 2017 [18] | ☆         | ☆☆            | ☆         | ☆         | 5/5   |
| Grabowicz et al. 2019[19]     | ☆         | ☆☆            | ☆         | ☆         | 5/5   |
| Clement et al. 2020[20]       | ☆         | ☆☆            | ☆         | ☆         | 5/5   |
| Kern et al. 2020[21]          | ☆         | ☆☆            | ☆         |           | 4/5   |

|                             |   |    |   |   |     |
|-----------------------------|---|----|---|---|-----|
| Kayıkçioğlu et al. 2020[22] | ☆ | ☆☆ | ☆ | ☆ | 5/5 |
| Smith et al. 2021[23]       | ☆ | ☆☆ | ☆ | ☆ | 5/5 |
| Singh et al. 2022[24]       | ☆ | ☆☆ | ☆ | ☆ | 5/5 |
| Kameel et al. 2023[25]      | ☆ | ☆☆ | ☆ | ☆ | 5/5 |

The methodological quality of each study was assessed after rating each study according to the following questions:

**Selection:** 1. Does the patient(s) represent(s) the whole experience of the investigator (centre) or is the selection method unclear to the extent that other patients with similar presentation may not have been reported? (yes/no)

**Ascertainment:** 2. Was the exposure adequately ascertained? (yes/no); 3. Was the outcome adequately ascertained? (yes/no)

**Causality:** 4. Was follow-up long enough for outcomes to occur? (yes/no)

**Reporting:** 5. Is the case(s) described with sufficient details to allow other investigators to replicate the research or to allow practitioners make inferences related to their own practice? (yes/no).

## References

1. GIKNIS FL, HOLT DE, WHITEMAN HW, SINGH MD, BENCHIMOL A, DIMOND EG. MYOCARDIAL INFARCTION IN TWENTY-YEAR-OLD IDENTICAL TWINS. *Am J Cardiol* [Internet]. 1965 Jul 1 [cited 2023 May 23];16(1):122–6. Available from: <http://www.ncbi.nlm.nih.gov/pubmed/14314197>
2. Sidd JJ, Sasahara AA, Littmann D. Coronary-Artery Disease in Identical Twins. *New England Journal of Medicine* [Internet]. 1966 Jan 13;274(2):55–60. Available from: <https://doi.org/10.1056/NEJM196601132740201>
3. Kreulen TH, Cohn PF, Gorlin R. Catheterization and Cardiovascular Diagnosis 1 :91-96 (1975) Case Report PREMATURE CORONARY ARTERY DISEASE IN IDENTICAL MALE TWINS STUDIED BY SELECTIVE CORONARY ARTERIOGRAPHY. 1975.
4. Holmes Jr DR, Kennel AJ, Smith HC, Gordon H, Moore B. Coronary artery disease in twins [Internet]. Vol. 45, *Br Heart J*. 1981. Available from: <http://heart.bmj.com/>
5. Herrington DM, Pearson TA. Clinical and Angiographic Similarities in Twins with Coronary Artery Disease. 1985.
6. Kanda T, Ohshima S, Yuasa K, Toyama T, Takase SI, Maebashi P, et al. Painless Myocardial Infarction in Identical Diabetic Twins. Vol. 30, *Jpn J Med*. 1991.
7. Samuels LE, Samuels FS, Thomas MP, Morris RJ, Wechsler AS. Coronary artery disease in identical twins. *Ann Thorac Surg* [Internet]. 1999 Aug 1 [cited 2023 May 23];68(2):594–600. Available from: <https://linkinghub.elsevier.com/retrieve/pii/S0003497599006293>
8. Frings AM, Mayer B, Böcker W, Hengstenberg C, Willemsen D, Riegger GAJ, et al. Comparative coronary anatomy in six twin pairs with coronary artery disease. *Heart*. 2000;83(1):47–50.
9. Ener S. Coronary artery disease in identical twins. *Ann Thorac Surg* [Internet]. 2000 Aug 1 [cited 2023 May 23];70(2):692. Available from: <https://linkinghub.elsevier.com/retrieve/pii/S0003497500016519>

10. Kaluža G, Abukhalil JM, Raizner AE. Identical atherosclerotic lesions in identical twins. *Circulation*. 2000;101(4).
11. Nathoe HMW, Stella PR, Eefting FD, de Jaegere PPT. Angiographic findings in monozygotic twins with coronary artery disease. *Am J Cardiol* [Internet]. 2002 Apr 15 [cited 2023 May 23];89(8):1006–9. Available from: <http://www.ncbi.nlm.nih.gov/pubmed/11950451>
12. Cokkinos P, Sbarouni E, Kremastinos DT. Coronary angioplasty in identical twins. *Int J Cardiol* [Internet]. 2006 Mar 8 [cited 2023 May 23];107(3):434–5. Available from: <http://www.ncbi.nlm.nih.gov/pubmed/16503274>
13. Gullu AU, Kizilay M, Ates M, Akcar M. The comparison of angiographic lesions and clinical outcomes in identical twins. *Interact Cardiovasc Thorac Surg*. 2007 Aug;6(4):575–6.
14. Segura L, Moreno R, Macaya C. Coronary Artery Disease and Percutaneous Coronary Intervention in a Set of Twins. *Revista Española de Cardiología (English Edition)* [Internet]. 2007;60(1):86–7. Available from: <https://www.revespcardiol.org/en-coronary-artery-disease-percutaneous-coronary-articulo-13098661>
15. Turley AJ, Chen V, Hall JA. Simultaneous presentation of coronary heart disease in identical twins. *Postgrad Med J* [Internet]. 2008 Feb 1;84(988):100–2. Available from: <https://doi.org/10.1136/pgmj.2007.064493>
16. Hanna D. CORONARY ARTERY DISEASE: ANATOMY AND PRESENTATION IN IDENTICAL TWINS IN IDENTICAL . *Ulster Med J*. 2009 Sep;
17. Goel K, Tweet M, Olson TM, Maleszewski JJ, Gulati R, Hayes SN. Familial Spontaneous Coronary Artery Dissection: Evidence for Genetic Susceptibility. *JAMA Intern Med* [Internet]. 2015 May 1;175(5):821–6. Available from: <https://doi.org/10.1001/jamainternmed.2014.8307>
18. Papanikolaou J et al. Twin Hearts in Identical Twins. *JOURNAL OF Invasive Cardiology*. 2017 Jul;
19. Grabowicz W, Masiarek K, Warchoń I, Górnik T, Lubiński A. Déjà vu: Coronary artery disease in monozygotic twins. Vol. 77, *Kardiologia Polska. Medycyna Praktyczna Cholerzyn*; 2019. p. 886–7.
20. Clement A, Picard F, Varenne O. Myocardial infarction in monozygotic twins. Vol. 13, *BMJ Case Reports*. BMJ Publishing Group; 2020.
21. Kern A, Bojko K, Sienkiewicz E, Zarzecki A, Bil J. Non-st-elevation acute coronary syndrome due to a totally occluded coronary artery: a history of two twin brothers. *Wiad Lek*. 2020;73(1):201–2.
22. Kayıkçıoğlu M, Uzun HG, Vardarli AT, Tokgözoğlu L. Monozygotic twins with familial hypercholesterolemia and high lipoprotein(a) levels leading to identical cardiovascular outcomes: Case report and review of the literature. *Türk Kardiyoloji Dernegi Arsivi*. 2020 Jul 1;48(5):531–8.
23. Smith MC, Baker JR, Gleaves E, Singh A, Kazimuddin M. Twinning: Coronary Artery Disease in Monozygotic Twins. *Cureus* [Internet]. 2021;13(7):e16139. Available from: <http://dx.doi.org/10.7759/cureus.16139>
24. Singh AP, Raj A, Bankar B, Nath RK. Enigma of Twins: Identical Presentation and Angiographic Lesion in Monozygotic Twins. *J Saudi Heart Assoc*. 2022;34(1):6–10.

25. Kassab K, Gupta V. Simultaneous ST-elevation myocardial infarction in monozygotic twins: a case report of entangled twins. *Eur Heart J Case Rep*. 2023 Feb 3;7(2).

### **Supplementary Figure S1. Cardiovascular disease-associated single nucleotide polymorphisms investigated in the current case of monozygotic twins**

AARS2, ABCA1, ABCC6, ABCC8, ABCC9, ABCG5, ABCG8, ABL1, ACAD9, ACADVL, ACTA1, ACTA2, ACTB, ACTC1, ACTG1, ACTN2, ACVR1, ACVR2B, ACVRL1, ADAMTS10, ADAMTS17, ADAMTS2, ADAMTSL4, AFF4, AGK, AGL, AGPAT2, AKAP9, ALDH18A1, ALMS1, ALPK3, AMMECR1, ANK2, ANKS6, ANO5, APOA1, APOA5, APOB, APOC2, APOC3, APOE, AQP1, ARHGAP31, ARID1A, ARID1B, ARMC4, ATP13A3, ATP6V0A2, ATP7A, ATPAF2, B3GAT3, B4GALT7, BAG3, BCOR, BGN, BMPR1B, BMPR2, BRAF, C12ORF57, C21ORF59, CACNA1C, CACNB2, CALM1, CALM2, CALM3, CALR3, CAPN3, CASQ2, CASZ1, CAV1, CAV3, CBL, CBS, CCDC103, CCDC114, CCDC151, CCDC39, CCDC40, CCNK, CDC42, CDH2, CDK13, CDK9, CFAP53, CHD4, CHD7, CHRM2, CHST14, COL11A1, COL11A2, COL1A1, COL1A2, COL2A1, COL3A1, COL4A5, COL5A1, COL5A2, COLGALT1, COX15, CPT2, CREB3L3, CREBBP, CRELD1, CRYAB, CSRP3, CTC1, CTNNA3, DBH, DES, DHCR7, DLG4, DLL4, DMD, DNAAF1, DNAAF2, DNAAF3, DNAAF5, DNAH11, DNAH5, DNAI1, DNAI2, DNAJC19, DNAL1, DOCK6, DOLK, DPM3, DSC2, DSE, DSG2, DSP, DTNA, DYSF, DYX1C1, EEF1A2, EFEMP2, EFTUD2, EHMT1, EIF2AK4, ELAC2, ELN, EMD, ENG, ENPP1, EOGT, EP300, EPG5, EPHB4, ETFA, ETFB, ETFDH, EVC, EVC2, FAH, FBLN5, FBN1, FBN2, FBXL4, FBXO32, FGD1, FHL1, FHOD3, FKBP14, FKRP, FKTN, FLNA, FLNC, FOXC1, FOXD4, FOXE3, FOXF1, FOXH1, FOXP1, FOXRED1, FXN, GAA, GATA4, GATA5, GATA6, GATAD1, GATC, GBE1, GDF1, GDF2, GFM1, GJA1, GJA5, GLA, GLB1, GMPBP, GPC3, GPIHBP1, GSK3B, GTPBP3, GUSB, HADHA, HAND1, HAND2, HCN4, HDAC8, HFE, HNRNP, HOXA1, HRAS, IDUA, ILK, INVS, ISPD, JAG1, JPH2, JUP, KAT6B, KCNA5, KCNE1, KCNE2, KCNH2, KCNJ2, KCNJ5, KCNK3, KCNQ1, KDM6A, KLF2, KLHL24, KMT2D, KRAS, KYNU, LAMA2, LAMP2, LARGE, LDB3, LDLR, LDLRAP1, LEFTY2, LEMD2, LIPA, LMF1, LMNA, LMOD2, LOX, LPL, LRRC10, LRRC6, LZTR1, MAP2K1, MAP2K2, MAP3K8, MAT2A, MED12, MED13L, MEIS2, MFAP5, MIPEP, MLYCD, MMP21, MRAS, MRPL3, MRPL44, MRPS22, MYBPC3, MYBPHL, MYCN, MYH11, MYH6, MYH7, MYL2, MYL3, MYL4, MYLK, MYO18B, MYOT, MYPN, MYRF, NAA15, NDUFAF2, NEXN, NF1, NF2, NFU1, NIPBL, NKX2-5, NKX2-6, NODAL, NONO, NOS1AP, NOTCH1, NOTCH2, NOTCH3, NR2F2, NRAP, NRAS, NSD1, NSUN2, NUP155, PARS2, PCCA, PCCB, PCSK9, PIH1D3, PITRM1, PITX2, PKD1L1, PKP2, PLEC, PLEKHM2, PLN, PLOD1, PNPLA2, POMT1, PPA2, PPCS, PPP1CB, PRDM16, PRDM6, PRKAG2, PRKD1, PRKG1, PTPN11, PUF60, PYCR1, QRSL1, RAB23, RAF1, RASA1, RASA2, RBCK1, RBM10, RBM20, RERE, RIT1, RMND1, RRAS, RYR2, SALL4, SARS2, SASH1, SCN10A, SCN1B, SCN3B, SCN5A, SCNN1B, SCNN1G, SCO1, SCO2, SDHA, SELENON, SGCA, SGC, SGCD, SGCG, SHOC2, SKI, SLC22A5, SLC25A20, SLC25A3, SLC25A4, SLC2A10, SLC39A13, SMAD2, SMAD3, SMAD4, SMAD6, SMAD9, SMARCB1, SMC1A, SMC3, SMCHD1, SOS1, SOS2, SOX17, SPAG1, SPEG, SPRED1, STAG2, STAMBP, STRA6, SYNGAP1, TAB2, TAZ, TBX1, TBX20, TBX4, TBX5, TCAP, TECRL, TFAP2B, TGDS, TGF2, TGF3, TGFBR1, TGFBR2, TLL1, TMEM43, TMEM70, TMEM94, TNNC1, TNNI3, TNNI3K, TNNT2, TOR1AIP1, TPM1, TRDN, TRIM32, TRPM4, TSFM, TTC25, TTN, TTR, UPF3B, VARS2, VCAN, VCL, VCP, VPS13A, XK, ZDHHC9, ZEB2, ZFPM2, ZIC3, ZMYND10, ZNF469
